# Supplementary material for: Biosynthesis of silver nanoparticles using Caesalpinia ferrea (Tul.) Martius extract: physicochemical characterization, antifungal activity and cytotoxicity
Source: PeerJ. 2018 Mar 19;6:e4361. doi: 10.7717/peerj.4361 (PMC5863706; doi:10.7717/peerj.4361)
Supplement: Supplemental Information 2 [file peerj-06-4361-s002.xlsx]

## Sheet: Plan1
						Positive Control		Nano S2
						0.2171		0.1617	0.1402	0.1853	0.1858	0.1178
						0.2498		0.1796	0.1531	0.1922	0.1848	0.1394		Control mean
						0.2095		0.1948	0.2152	0.1839	0.2017	0.1857		0.2401
						0.254		0.2247	0.2091	0.2124	0.2206	0.1947
						0.2383		0.1496	0.194	0.1807	0.2145	0.1971
						0.2544		0.2314	0.2174	0.2462	0.2294	0.2369
						0.2401		0.2288	0.2314	0.2609	0.2306	0.2203
						0.2581		0.1949	0.2681	0.2585	0.2127	0.2385
		L929 P14
	Concentration	Jucá solution						Positive Control		Ethanol							CONTROL MEAN
	1	A	0.0593	0.0618	0.0598	0.0653	0.0746	0.1571		0.0519	0.0522	0.0517	0.0525	0.052			0.2323
	2	B	0.1699	0.2026	0.2122	0.1711	0.2154	0.1948		0.1615	0.12	0.1044	0.104	0.126
	3	C	0.2015	0.2167	0.2305	0.2267	0.2289	0.2295		0.1614	0.1816	0.1704	0.1659	0.1639
	4	D	0.2207	0.2353	0.2418	0.2167	0.2337	0.2482		0.1781	0.2047	0.1862	0.1801	0.186
	5	E	0.2329	0.2282	0.2258	0.2383	0.2144	0.2467		0.1832	0.2077	0.2148	0.2206	0.1982
	6	F	0.2373	0.2403	0.2337	0.2522	0.2382	0.2357		0.2216	0.2389	0.2359	0.2326	0.2219
	7	G	0.2154	0.2306	0.2306	0.2319	0.2334	0.2388		0.2334	0.2298	0.2501	0.2538	0.2324
	8	H	0.1904	0.2094	0.2622	0.2506	0.256	0.2328		0.2169	0.2528	0.2327	0.2203	0.2801
Cell Viability		L929 LP14
0		Control
1	0	1
2	0	2	83.83	JUCÁ	1	JUCÁ	2	JUCÁ	3	JUCÁ	4	JUCÁ	5	JUCÁ	6	JUCÁ	7	JUCÁ	8
3	0	3	98.77	1	25521	1	73120	1	86719	1	94983	1	100. 233	1	102127	1	92702	1	105247
4	0	4	106.81	2	26596	2	87193	2	93261	2	101267	2	98210	2	103418	2	99248	2	90120
5	0	5	106172	3	25763	3	91324	3	99200	3	104064	3	97177	3	100578	3	99244	3	112845
6	0	6	101438	4	28103	4	73636	4	97563	4	93261	4	102588	4	108540	4	99803	4	107.51
7	0	7	102772	5	32105	5	92702	5	98512	5	100578	5	92271	5	102515	5	100449	5	110176
8	0	8	100190	AVERAGE	27612		83595		95051		98. 830		98090		103436		98289		105248
7	0	7	102772	MD	2709		9564		5191		4532		3845		3032		3162		10289
8	0	8	100190	ETHANOL	1	ETHANOL	2	ETHANOL	3	ETHANOL	4	ETHANOL	5	ETHANOL	6	ETHANOL	7	ETHANOL	8
AVERAGE	0		100	1	22337	1	73120	1	69463	1	76650	1	78845	1	95370	1	100449	1	93348
SD	0		7715	2	22466	2	51645	2	78156	2	88098	2	89389	2	102816	2	98986	2	108799
CelL Viability		L929 P14		3	22251	3	44931	3	73336	3	80136	3	92444	3	101525	3	107637	3	100148
				4	22595	4	44759	4	71399	4	77510	4	94940	4	100105	4	109229	4	94810
				5	22380	5	54227	5	70539	5	80050	5	94940	5	95500	5	100019	5	99277
				AVERAGE	22406		48890		72578		80500		90112		99064		103246		99278
				SD	0.132		4790		3426		4523		6700		3449		4800		6989
				Nano S2	1	Nano S2	2	Nano S2	3	Nano S2	4	Nano S2	5	Nano S2	6	Nano S2	7	Nano S2	8
				1	67326	1	74779	1	81108	1	93558	1	83459	1	96347	1	95265	1	81150
				2	58374	2	63746	2	89602	2	87062	2	80775	2	90518	2	96347	2	111628
				3	77153	3	80026	3	76570	3	88436	3	75237	3	95247	3	84838	3	95161
				4	77361	4	76.945	4	83981	4	91851	4	89311	4	95515	4	96014	4	88561
				5	49048	5	73874	5	77319	5	81067	5	89311	5	98637	5	91726	5	99304
				Average	65.9		73.9		81.7		88.4		83.6		95.3		92.8		95.2
				SD	12.3		6.1		5.3		4.8		6.0		3.0		4.8		11.5
														Nano
					Jucá
